# Supplementary material
Source: PubMed Central journal article supplement (PMC5992919)
Supplement: NIHMS936968-supplement-DS.pdf [file NIHMS936968-supplement-DS.pdf]

# **A Comprehensive Analysis of the Unfolded Protein Response in Breast Cancer Subtypes**

**Jiang et al**

**Table S1. Clinical properties of 1,182 patients in the TCGA invasive breast cancer dataset**

|         |         |           |         |          |         |            | Stage |    |    |    |     |     |     |      |      |      |    |    |
|---------|---------|-----------|---------|----------|---------|------------|-------|----|----|----|-----|-----|-----|------|------|------|----|----|
| ER<br>+ | PR<br>+ | HER2<br>+ | LN<br>+ | MET<br>+ | Relapse | Age        | I     | IA | IB | II | IIA | IIB | III | IIIA | IIIB | IIIC | IV | X  |
| 77<br>% | 67<br>% | 15%       | 51<br>% | 2%       | 9%      | 58 ±<br>13 | 7%    | 8% | 1% | 5% | 32% | 20% | 2%  | 13%  | 3%   | 4%   | 2% | 1% |

LN: lymph node; MET: metastasis

**Supplementary Information. Gene signatures used in the study**

**XBPI gene signature (gene symbol):**

|         |          |          |         |
|---------|----------|----------|---------|
| XBPI    | RNF160   | IL17RB   | PNPLA6  |
| RIT1    | NR3C1    | PPP4R2   | ARFGEF2 |
| PDE8A   | SDF2L1   | DDIT3    | ELK4    |
| TROVE2  | SIK1     | SLC6A6   | SON     |
| POLR3F  | PDK1     | GOLIM4   | CAMKK2  |
| MYST4   | WDR7     | ZFX      | ENTPD7  |
| DNAJB9  | SLC1A4   | CDK6     | DPM3    |
| EP400   | WWC2     | TOP1     | PPIG    |
| UBE2O   | MAN1A2   | NUAK1    | RAB26   |
| MAFG    | RSL1D1   | SIVA1    | SIAH2   |
| RSRC2   | FLJ10213 | AXL      | DDX17   |
| SCAMP1  | BHLHE40  | PPFIBP1  | CCNE2   |
| PMEPA1  | RLF      | ZNF292   | ITFG2   |
| GORASP1 | ARL1     | CCNG2    | MTDH    |
| LAMA1   | TIMM17B  | HIST1H1E | BRD2    |
| PDIA5   | CHSY1    | EPRS     | PCLO    |
| YTHDC2  | TAOK1    | SETX     |         |
| ITGB1   | ARHGEF10 | EFNA1    |         |

**XBPI gene signature (Affymetrix HG-U133A probesets):**

|             |          |             |        |             |                 |
|-------------|----------|-------------|--------|-------------|-----------------|
| 218098_at   | ARFGEF2  | 208685_x_at | BRD2   | 203044_at   | CHSY1           |
| 216620_s_at | ARHGEF10 | 213812_s_at | CAMKK2 | 218775_s_at | CLDN22 /// WWC2 |
| 201659_s_at | ARL1     | 205034_at   | CCNE2  | 209383_at   | DDIT3           |
| 202686_s_at | AXL      | 202769_at   | CCNG2  | 208718_at   | DDX17           |
| 201170_s_at | BHLHE40  | 207143_at   | CDK6   | 202842_s_at | DNAJB9          |

|                           |           |             |         |             |         |
|---------------------------|-----------|-------------|---------|-------------|---------|
| 219373_at                 | DPM3      | 204589_at   | NUAK1   | 201964_at   | SETX    |
| 202023_at                 | EFNA1     | 213558_at   | PCLO    | 209339_at   | SIAH2   |
| 214831_at                 | ELK4      | 212522_at   | PDE8A   | 208078_s_at | SIK1    |
| 220153_at                 | ENTPD7    | 203857_s_at | PDIA5   | 203489_at   | SIVA1   |
| 212375_at                 | EP400     | 206686_at   | PDK1    | 212811_x_at | SLC1A4  |
| 200842_s_at               | EPRS      | 217875_s_at | PMEPA1  | 205921_s_at | SLC6A6  |
| 204324_s_at               | GOLIM4    | 203718_at   | PNPLA6  | 214988_s_at | SON     |
| 215749_s_at               | GORASP1   | 205218_at   | POLR3F  | 216310_at   | TAOK1   |
| 208553_at                 | HIST1H1E  | 203735_x_at | PPFIBP1 | 203342_at   | TIMM17B |
| 219255_x_at               | IL17RB    | 208994_s_at | PPIG    | 208901_s_at | TOP1    |
| 214148_at<br>LOC100507424 | ITFG2 /// | 220764_at   | PPP4R2  | 212852_s_at | TROVE2  |
| 211945_s_at               | ITGB1     | 50965_at    | RAB26   | 218141_at   | UBE2O   |
| 222346_at                 | LAMA1     | 209882_at   | RIT1    | 212880_at   | WDR7    |
| 204970_s_at               | MAFG      | 204243_at   | RLF     | 200670_at   | XBP1    |
| 217922_at                 | MAN1A2    | 212018_s_at | RSL1D1  | 213077_at   | YTHDC2  |
| 212251_at                 | MTDH      | 202302_s_at | RSRC2   | 214678_x_at | ZFX     |
| 201865_x_at               | NR3C1     | 212416_at   | SCAMP1  | 212368_at   | ZNF292  |
|                           |           | 218681_s_at | SDF2L1  |             |         |

**ATF4/CHOP gene signature (gene symbol):**

|          |          |               |               |
|----------|----------|---------------|---------------|
| Angptl6  | Gpt2     | Eprs          | Gnpnat1       |
| Trib3    | Cd74     | Iars          | 2610528E23Rik |
| Ddit3    | Aars     | Lonp1         | Sqstm1        |
| Atf3     | Otub2    | Taf15         | Ghitm         |
| Slc7a11  | Nars     | Fam175a       | Eif2s2        |
| Cdsn     | Aldh18a1 | Slc20a1       | Phyhd1        |
| Hspa5    | Tspyl4   | 2700007P21Rik | Clcn3         |
| Aldh1l2  | Yars     | Dnaja3        | D4Bwg0951e    |
| Slc7a5   | Lars     | Fads3         | Gtpbp2        |
| Cyb5r1   | Gars     | Zfp238        | A630007B06Rik |
| Nrip2    | Sars     | Ypel5         | Krtcap2       |
| Ppp1r15a | Xpot     | Nfe2l1        | Cxadr         |
| Wars     | Abcc4    | Cdh24         | Cebpg         |
| Atf5     | Ero1l    | Deb1          | Ddr2          |
| Acot2    | Akna     | Ascc2         | Leprotil1     |
| Mthfd2   | Mtml     | Atf6          | Ick           |
| Paqr3    | Bcat2    | Nfu1          | Ift172        |

|         |        |               |         |
|---------|--------|---------------|---------|
| Arhgef2 | Pnrc2  | Tab2          | Ptn     |
| Ube2g2  | Hdac8  | Agap1         | Dysf    |
| Tmem11  | Vars   | Tbp11         | Emilin1 |
| Vldlr   | Hfe    | Snai2         | Dusp6   |
| Eif3c   | Prdm15 | Jhdml1d       | Has2    |
| Zc3hav1 | Erlin1 | Zfp598        |         |
| Dpf2    | Steap1 | 1810031K17Rik |         |
| Lgals3  | Stc2   | Pacsin2       |         |

**ATF4/CHOP gene signature (Affymetrix HG-U133A probesets):**

|             |                  |             |                  |             |          |
|-------------|------------------|-------------|------------------|-------------|----------|
| 201000_at   | AARS             | 200842_s_at | EPRS             | 201651_s_at | PAC SIN2 |
| 203196_at   | ABCC4            | 202441_at   | ERLIN1           | 213372_at   | PAQR3    |
| 202982_s_at | ACOT1 /// ACOT2  | 218498_s_at | ERO1L            | 37028_at    | PPP1R15A |
| 204066_s_at | AGAP1            | 204257_at   | FADS3            | 209466_x_at | PTN      |
| 217791_s_at | ALDH18A1         | 208693_s_at | GARS             | 200802_at   | SARS     |
| 209435_s_at | ARHGEF2          | 209249_s_at | GHITM            | 201920_at   | SLC20A1  |
| 215684_s_at | ASCC2            | 221050_s_at | GTPBP2           | 209921_at   | SLC7A11  |
| 202672_s_at | ATF3             | 206432_at   | HAS2             | 201195_s_at | SLC7A5   |
| 204998_s_at | ATF5             | 206087_x_at | HFE              | 213139_at   | SNAI2    |
| 203952_at   | ATF6             | 211936_at   | HSPA5            | 201471_s_at | SQSTM1   |
| 203576_at   | BCAT2            | 204744_s_at | IARS             | 203438_at   | STC2     |
| 209619_at   | CD74             | 204569_at   | ICK              | 205542_at   | STEAP1   |
| 206192_at   | CDSN             | 221778_at   | JHDM1D           | 212184_s_at | TAB2     |
| 204203_at   | CEBPG            | 217810_x_at | LARS             | 202840_at   | TAF15    |
| 201734_at   | CLCN3            | 202594_at   | LEPROTL1         | 208398_s_at | TBPL1    |
| 203917_at   | CXADR            | 208949_s_at | LGALS3           | 203437_at   | TMEM11   |
| 202263_at   | CYB5R1           | 217779_s_at | LOC100996626 /// | 218145_at   | TRIB3    |
| 209383_at   | DDIT3            | PNRC2       |                  | 212928_at   | TSPYL4   |
| 205168_at   | DDR2             | 209017_s_at | LONP1            | 209042_s_at | UBE2G2   |
| 205963_s_at | DNAJA3           | 201761_at   | MTHFD2           | 201797_s_at | VARS     |
| 202116_at   | DPF2             | 36920_at    | MTM1             | 209822_s_at | VLDLR    |
| 208891_at   | DUSP6            | 200027_at   | NARS             | 200629_at   | WARS     |
| 218660_at   | DYSF             | 200759_x_at | NFE2L1           | 212160_at   | XPOT     |
| 208726_s_at | EIF2S2           | 218946_at   | NFU1             | 212048_s_at | YARS     |
| 200647_x_at | EIF3C /// EIF3CL | 215104_at   | NRIP2            | 217783_s_at | YPEL5    |
| 204163_at   | EMILIN1          | 219369_s_at | OTUB2            | 213051_at   | ZC3HAV1  |

**HIF1 $\alpha$  gene signature (gene symbol):**

VEGFA  
SLC2A1  
RORB  
PIK3CB  
PIK3CA  
PFKFB3  
PDK1  
NDRG1  
KDM3A  
HK2  
EGLN1  
DDIT4  
CREBBP

**HIF1 $\alpha$  gene signature (Affymetrix HG-U133A probesets):**

|             |        |
|-------------|--------|
| 202160_at   | CREBBP |
| 202887_s_at | DDIT4  |
| 221497_x_at | EGLN1  |
| 202934_at   | HK2    |
| 212689_s_at | KDM3A  |
| 200632_s_at | NDRG1  |
| 206686_at   | PDK1   |
| 202464_s_at | PFKFB3 |
| 204369_at   | PIK3CA |
| 212688_at   | PIK3CB |
| 206443_at   | RORB   |
| 201250_s_at | SLC2A1 |
| 210512_s_at | VEGFA  |
